# Supplementary material
Source: PubMed Central journal article supplement (PMC2586815)
Supplement: NIHMS59840-supplement-01.pdf [file NIHMS59840-supplement-01.pdf]

## Supplemental Data

### **Chk2 Suppresses the Oncogenic Potential of DNA Replication-Associated DNA Damage**

Travis H. Stracker, Suzana S. Couto, Carlos Cordon-Cardo, Tulio Matos, and John H.J. Petrini

#### **Supplemental Experimental Procedures**

##### ***Immunoreagents and Western Blotting***

Antibodies for mMre11 and mNbs1 were described (Stracker et al., 2007; Theunissen et al., 2003; Williams et al., 2002). Antibodies were purchased for Chk2 (Upstate, 1:500), p53 (Vector, CM5 1:1000), p53-S15 (R&D, 1:1000), Actin (Sigma, 1:2000), Atm-S1981 (Cell Signaling, 1:1000), BID, S61 and S78 (Bethyl Labs, 1:1000), Histone H3-S10 (Upstate, 1:200), BrdU-FITC (BD Biosciences, 1:200). Anti-Atm (MAT3, 1:3000) monoclonal antibody was a gift from Yossi Shiloh. Cells were lysed in TNG lysis buffer with 150 mM NaCl (Kitagawa et al., 2004). Equal amounts of protein (Biorad DC assay) were run on SDS-PAGE or 3-8% Tris-acetate gels (Invitrogen) and transferred to PVDF membranes (Millipore). Blocking and incubation with antibodies was done in 5% dry milk in PBS-T at 4°C overnight. The ECL-plus kit (GE Healthcare) was used for detection after incubation with the appropriate secondary antibodies for 1 hour at room temperature in PBS-T w/ 5% dry milk. MG132 (Sigma) was used at 10  $\mu$ M and dexamethasone (Sigma) was used at 1 mM.

##### ***Pathology, Histology, and Immunohistochemistry***

Moribund mice were sacrificed, tissues fixed in 10% neutral buffered formalin, and embedded in paraffin in accordance with standard procedures. For immunohistochemistry (IHC) analysis representative sections were deparaffinized, rehydrated in graded alcohols, and processed using the avidin-biotin immunoperoxidase method (Trotman et al., 2006). Antigen retrieval by microwave oven treatment was performed using standard procedures. Diaminobenzidine was used as the chromogen and hematoxylin to counterstain nuclei and Ki-67 (NovoCastra), CD3 (DAKO), B220 (BD Biosciences-PharMingen), and MAC2 (Cedarlane) antibodies were used for IHC. Apoptosis was determined by TUNEL assay in tissue sections as previously described (Garcia-Barros et al., 2003). Pathological analysis was carried out in the MSKCC Genetically Engineered Mouse (GEM) Phenotyping core facility by Krista M.D. La Perle and Suzana S. Couto.

### ***Sequencing of p53 and p19<sup>ARF</sup>***

For amplification and sequencing of *p53* exons 5-10 from genomic DNA the following primers were utilized for amplification and priming of the sequencing reaction: mp53-5F TACTCTCCTCTCAATAAG, mp53-I6R CGGGTTGCTAGAAAGTCAAC, mp53-I6F TGCCGAACAGGTGGAATATC, mp53-I7R TGGAACAGAAACAGGCAGAA, mp53-I8F TCTGTGGCTTCTCGGGGTTCT, mp53-9R ACCTTGAGGGTGAAATACTCTCC, mp53-10F GTGCTTCCATCTCACTTC, mp53-10R GGTAGAGCACACAGGCA. For cDNA sequencing, the primers ATGGAGGAGTCACAGTCGGAT and AGTCAGGCCCACTTTCTTGAC

encompassing exons 2-11 of *p53* were used for PCR amplification and sequencing. The primers p19Ex1- TTCTCACCTCGCTTGTACAGT and p19Ex3-CCACATGCTAGACACGCTAGCATC were used for the amplification and sequencing of *p19<sup>ARF</sup>*.

### **Microarray analysis**

Data was analyzed using the Bioconductor packages ([www.bioconductor.com](http://www.bioconductor.com)) for the R statistical system. Raw Affymetrix CEL files were normalized and quantitated using the GC-RMA algorithm to give the signal level (log base 2 transformed in subsequent analysis). To determine genes that are differentially expressed between the various sample types, the LIMMA package (Bioconductor) was used to perform a variant of linear models (t-test or ANOVA) where the variance is corrected to deal with small sample numbers. To account for the multi-testing issue, the False Discovery Rate (FDR) method was used and genes filtered at an FDR level of 0.05. The heatmap in Figure 4 was generated using Genespring (Silicon Genetics).

### **Supplemental References**

Garcia-Barros, M., Paris, F., Cordon-Cardo, C., Lyden, D., Rafii, S., Haimovitz-Friedman, A., Fuks, Z., and Kolesnick, R. (2003). Tumor response to radiotherapy regulated by endothelial cell apoptosis. *Science* 300, 1155-1159.

Kitagawa, R., Bakkenist, C. J., McKinnon, P. J., and Kastan, M. B. (2004). Phosphorylation of SMC1 is a critical downstream event in the ATM-NBS1-BRCA1 pathway. *Genes Dev* 18, 1423-1438.

Stracker, T. H., Morales, M., Couto, S. S., Hussein, H., and Petrini, J. H. (2007). The carboxy terminus of NBS1 is required for induction of apoptosis by the MRE11 complex. *Nature*.

Theunissen, J. W., Kaplan, M. I., Hunt, P. A., Williams, B. R., Ferguson, D. O., Alt, F. W., and Petrini, J. H. (2003). Checkpoint failure and chromosomal

instability without lymphomagenesis in *Mre11*(ATLD1/ATLD1) mice. *Mol Cell* 12, 1511-1523.

Trotman, L. C., Alimonti, A., Scaglioni, P. P., Koutcher, J. A., Cordon-Cardo, C., and Pandolfi, P. P. (2006). Identification of a tumour suppressor network opposing nuclear Akt function. *Nature* 441, 523-527.

Williams, B. R., Mirzoeva, O. K., Morgan, W. F., Lin, J., Dunnick, W., and Petrini, J. H. (2002). A murine model of nijmegen breakage syndrome. *Curr Biol* 12, 648-653.

## Supplemental Figures and Tables

### Table S1. Metaphase Aberrations in Proliferating Splenocytes.

Untreated or IR treated (1 Gy) splenocytes stimulated with IL-4 and LPS were analyzed for metaphase aberrations after Giemsa staining. Cells were recovered for 1 hour after IR treatment and incubated in colce. Scored chromosomal aberrations are listed. *Chk2* deficiency did not cause chromosome instability or enhance that observed in *Mre11*<sup>ATLD1/ATLD1</sup> cultures.

| Genotype                                                          | N  | IR (Gy) | Cd | Frag | Rearrg | # abnormal | % abnormal |
|-------------------------------------------------------------------|----|---------|----|------|--------|------------|------------|
| <i>WT</i>                                                         | 30 | 0       | 1  | 0    | 0      | 1          | 3.33       |
| <i>Chk2</i> <sup>-/-</sup>                                        | 30 | 0       | 0  | 0    | 0      | 0          | 0.00       |
| <i>Mre11</i> <sup>ATLD1/ATLD1</sup>                               | 80 | 0       | 3  | 2    | 0      | 5          | 6.25       |
| <i>Mre11</i> <sup>ATLD1/ATLD1</sup><br><i>Chk2</i> <sup>-/-</sup> | 84 | 0       | 5  | 1    | 0      | 6          | 7.14       |
| <i>WT</i>                                                         | 31 | 0.5     | 6  | 0    | 0      | 6          | 19.35      |
| <i>Chk2</i> <sup>-/-</sup>                                        | 30 | 0.5     | 7  | 0    | 0      | 7          | 23.3       |
| <i>Mre11</i> <sup>ATLD1/ATLD1</sup>                               | 30 | 0.5     | 9  | 4    | 0      | 13         | 43.33      |
| <i>Mre11</i> <sup>ATLD1/ATLD1</sup><br><i>Chk2</i> <sup>-/-</sup> | 35 | 0.5     | 10 | 0    | 1      | 15         | 42.86      |

## Supplemental Figure S1

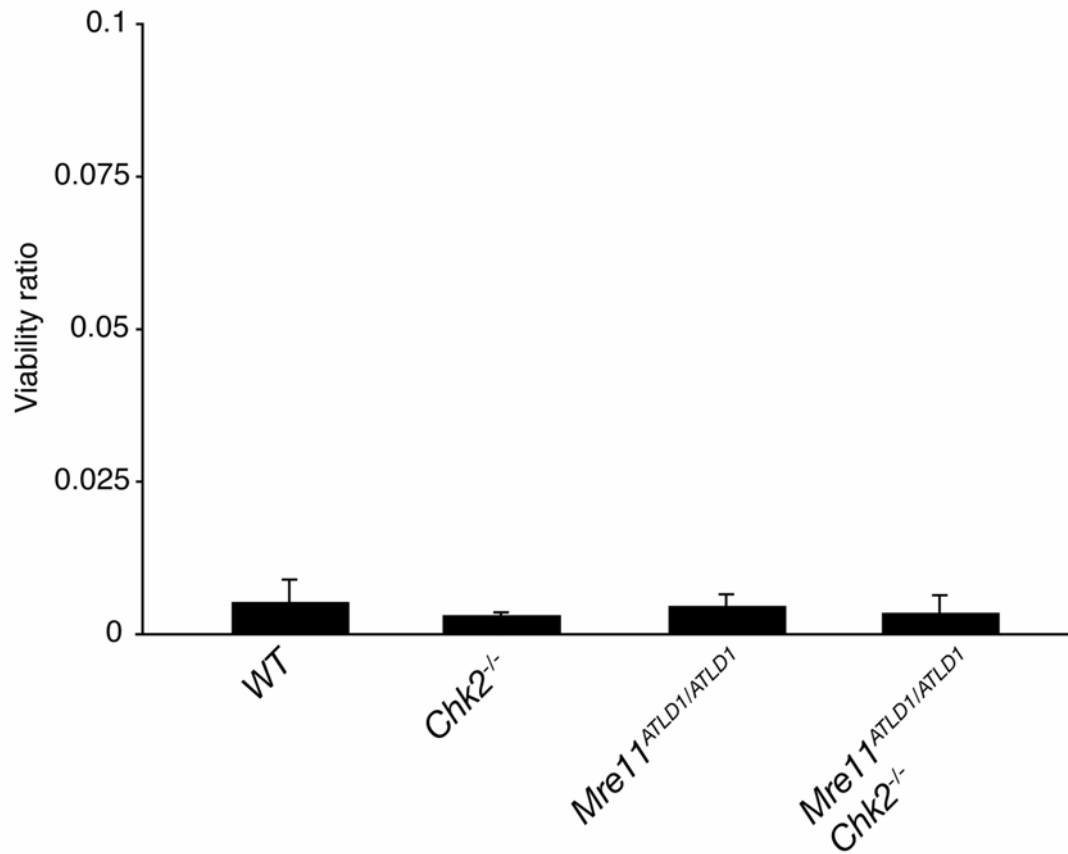

### **Figure S1. Apoptosis in response to dexamethasone.**

Thymocytes were treated with 1 mM dexamethasone for 20 hours and apoptosis was analyzed as described in the experimental procedures section. Viability ratios are plotted for each genotype.

Supplemental Figure S2

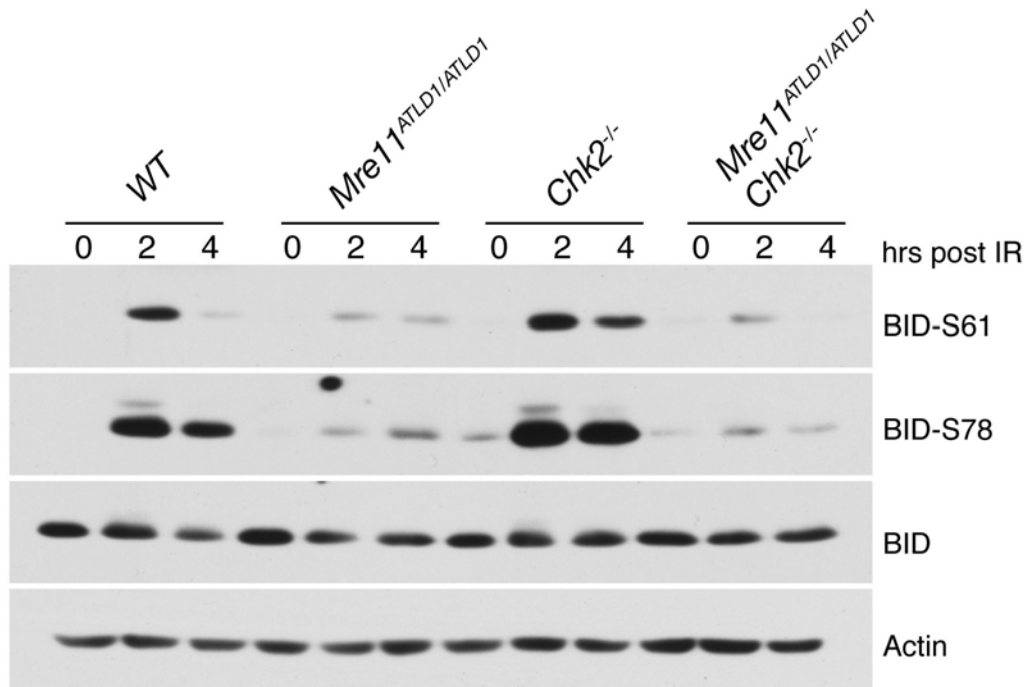

**Figure S2. BID phosphorylation in splenocytes.**

Western blots from mock or irradiated splenocytes were probed with antibodies specific for phosphorylated or total BID. BID phosphorylation after irradiation is attenuated by Mre11 hypomorphism but not by loss of Chk2.

Supplemental Figure S3

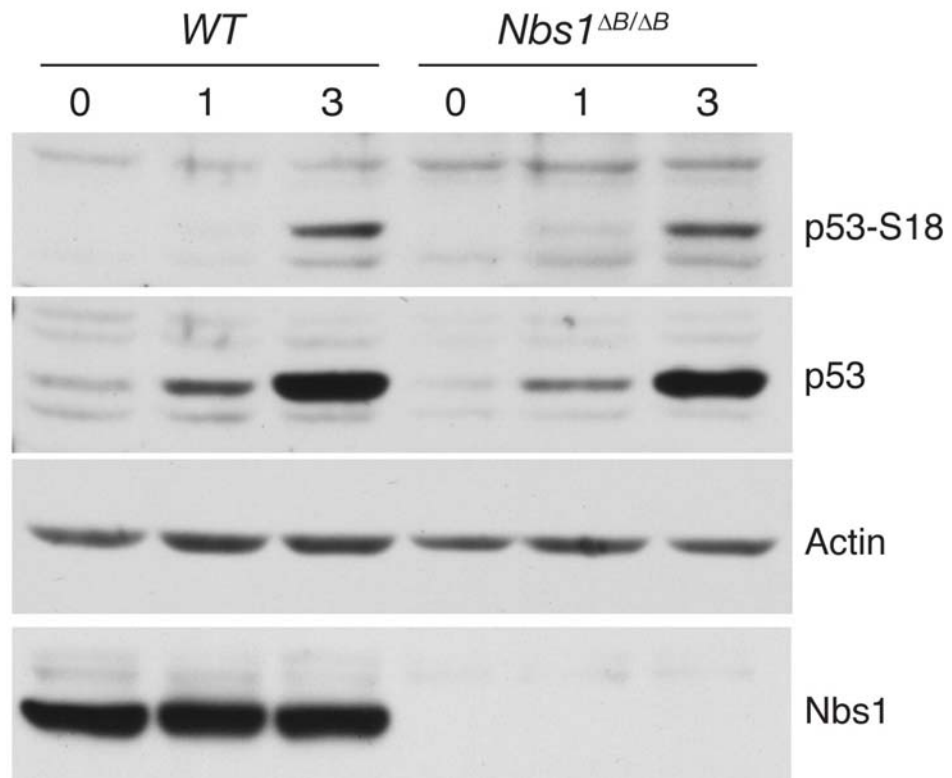

**Figure S3. Stabilization and phosphorylation of p53 in *Nbs1*<sup>ΔB/ΔB</sup> thymocytes.**

Western blots from mock or irradiated (IR) thymocytes at the indicated time points post treatment were probed with antibodies specific for phosphorylated (S18) or total p53. p53 responses and apoptosis appear normal in cell cultures from *Nbs1*<sup>ΔB/ΔB</sup> animals.

Supplemental Figure S4

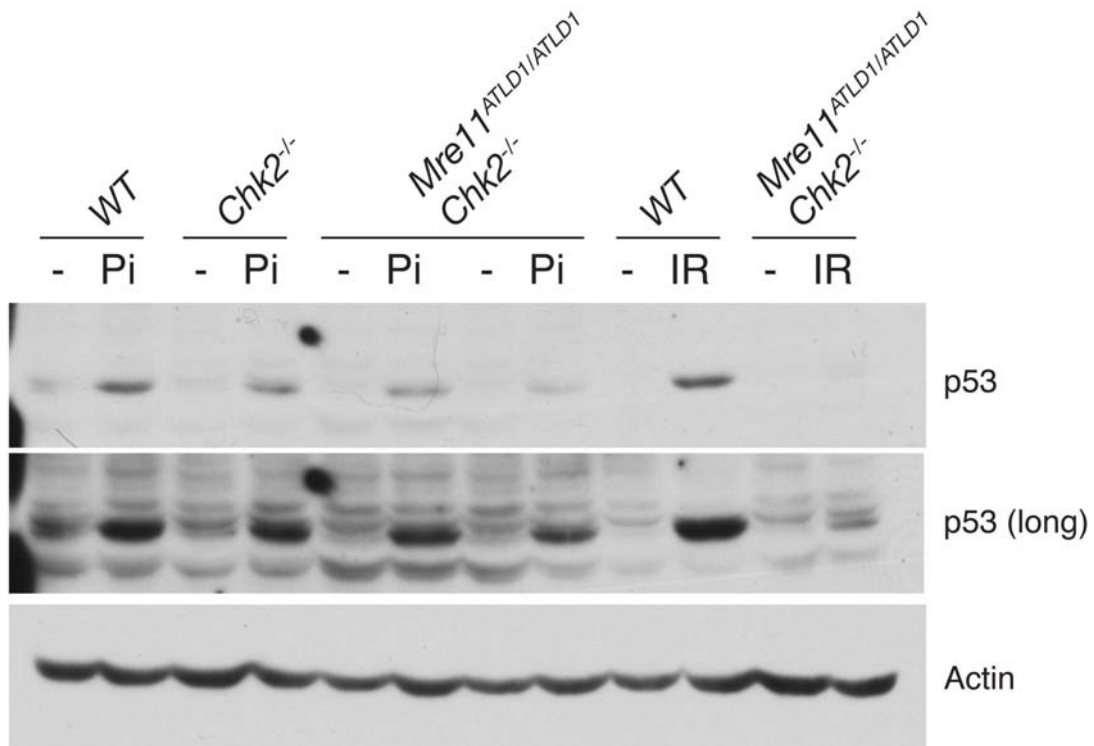

**Figure S4. Stabilization of p53 in MG132 treated thymocytes.**

Lysates from mock treated, 10  $\mu$ M MG132 treated (Pi) or irradiated (IR, 5 Gy) thymocytes were harvested 4.5 hours post treatment and Western blots were probed with antibodies for p53 and Actin (loading control). p53 is stabilized to similar levels in wild type and *Mre11*<sup>ATLD1/ATLD1</sup> *Chk2*<sup>-/-</sup> cell cultures in response to MG132 but not IR treatment.

**Table S2 is included as separate excel file.**

**Table S2. Statistical analysis of microarray data.**

Raw affymetrix .CEL files were analyzed as described in the materials and methods. Lists of statistically significant changes after IR treatment of WT and *Atm*<sup>-/-</sup> thymocytes are presented. Column header abbreviations: Gene symbol (SYM), false discovery rate (FDR), and fold change (FC). No significant changes were identified between mock and irradiated *Chk2*<sup>-/-</sup> samples.



Supplemental Figure S5

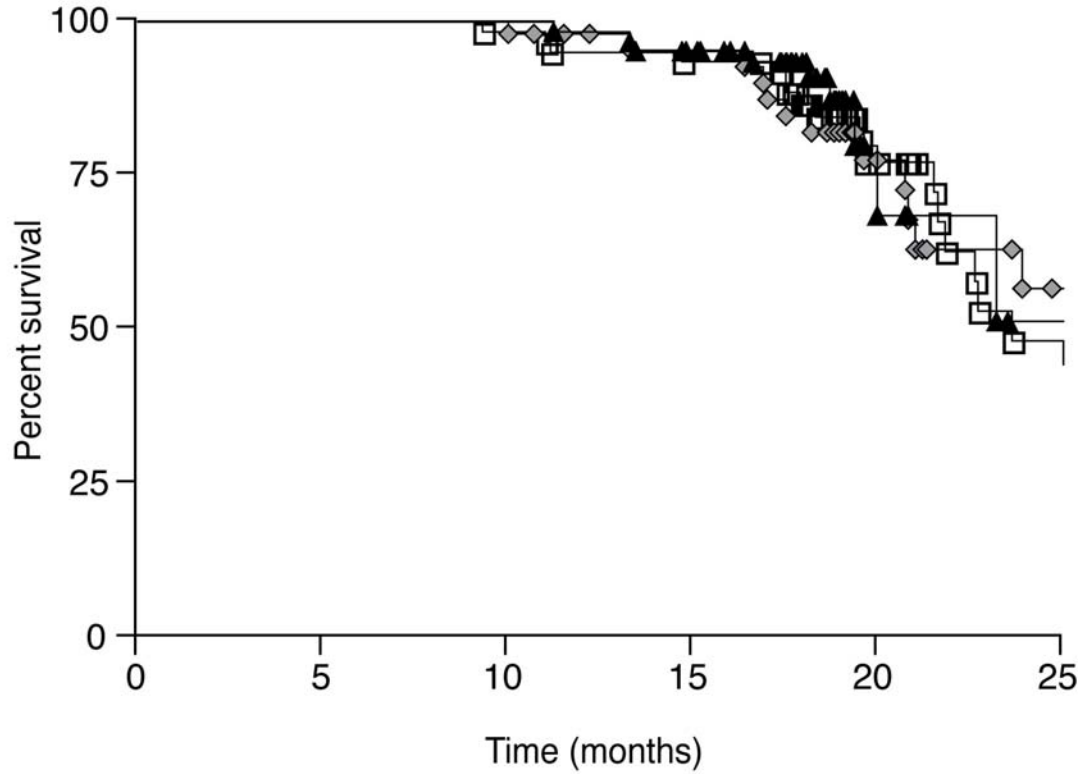

**Figure S5. Cohort survival.**

Individual Kaplan Meier survival curves for wild type (*WT*, ◆, n=62), *Nbs1*<sup>ΔB/ΔB</sup> (□, n=61), and *Mre11*<sup>ATLD1/ATLD1</sup> (▲, n=49) animals (these curves were combined in Figure 5A).

Supplemental Figure S6

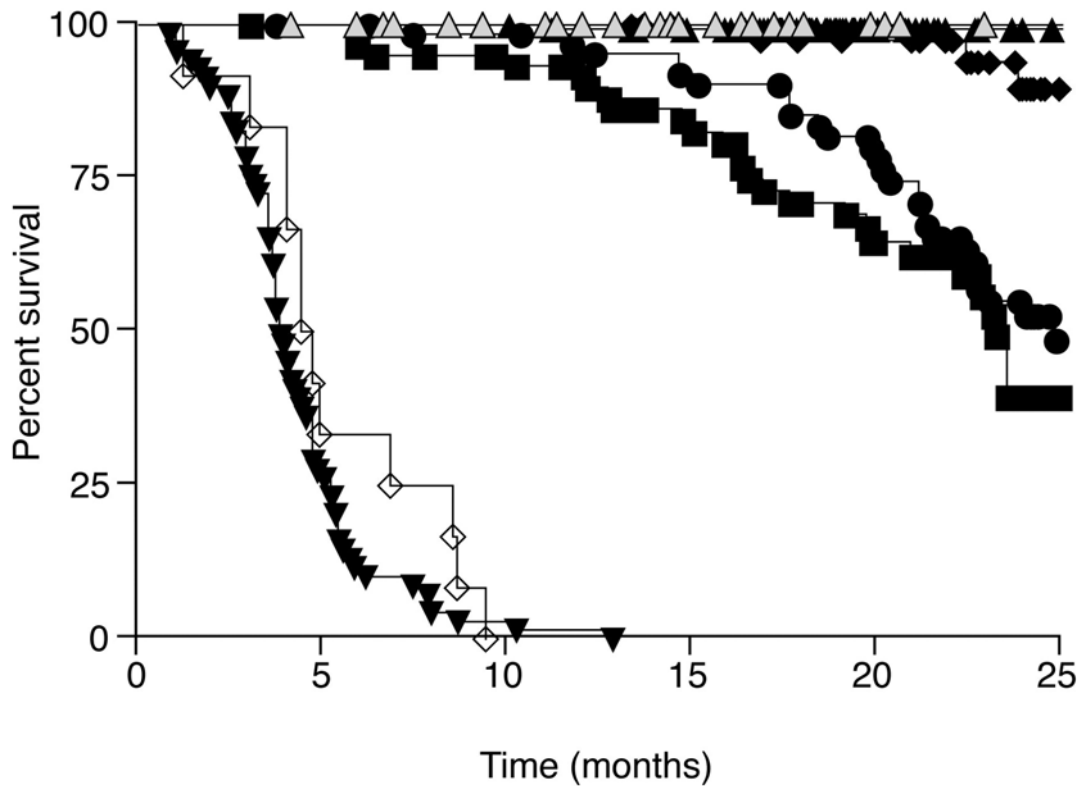

**Figure S6. Tumor free survival.**

Kaplan Meier tumor free survival curves for WT/*Nbs1*<sup>ΔB/ΔB</sup>/*Mre11*<sup>ATLD1/ATLD1</sup> (▲, n=172), *Chk2*<sup>-/-</sup> (◆, n=41), *Nbs1*<sup>ΔB/ΔB</sup> *Chk2*<sup>-/-</sup> (■, n=41), *Mre11*<sup>ATLD1/ATLD1</sup> *Chk2*<sup>-/-</sup> (●, n=41), *Atm*<sup>-/-</sup> (▼, n=71), *Atm*<sup>-/-</sup> *Chk2*<sup>-/-</sup> (◇, n=19), *Prkdc*<sup>scid/scid</sup> *Chk2*<sup>-/-</sup> (▲, n=34)

**Table S3. Statistical analysis of survival curves.** Analysis of statistically significant differences between survival curves and tumor free survival curves. P-values were generated using the logrank test (Prism software).

*Overall cohort survival (logrank test)*

|                            | <i>Chk2</i> <sup>-/-</sup> | <i>Mre11</i> <sup>ATLD1/ATLD1</sup><br><i>Chk2</i> <sup>-/-</sup> | <i>Nbs1</i> <sup>ΔB/ΔB</sup><br><i>Chk2</i> <sup>-/-</sup> | <i>Prkdc</i> <sup>scid/scid</sup><br><i>Chk2</i> <sup>-/-</sup> |
|----------------------------|----------------------------|-------------------------------------------------------------------|------------------------------------------------------------|-----------------------------------------------------------------|
| WT                         | 0.7711                     | 0.0078                                                            | <0.0001                                                    | 0.0058                                                          |
| <i>Chk2</i> <sup>-/-</sup> | -                          | 0.0700                                                            | <0.0001                                                    | 0.0829                                                          |

*Tumor free cohort survival (logrank test)*

|                            | <i>Chk2</i> <sup>-/-</sup> | <i>Mre11</i> <sup>ATLD1/ATLD1</sup><br><i>Chk2</i> <sup>-/-</sup> | <i>Nbs1</i> <sup>ΔB/ΔB</sup><br><i>Chk2</i> <sup>-/-</sup> | <i>Prkdc</i> <sup>scid/scid</sup><br><i>Chk2</i> <sup>-/-</sup> |
|----------------------------|----------------------------|-------------------------------------------------------------------|------------------------------------------------------------|-----------------------------------------------------------------|
| WT                         | 0.1161                     | <0.0001                                                           | <0.0001                                                    | 0.2015                                                          |
| <i>Chk2</i> <sup>-/-</sup> | -                          | 0.0002                                                            | <0.0001                                                    | 0.5168                                                          |

Supplemental Figure S7

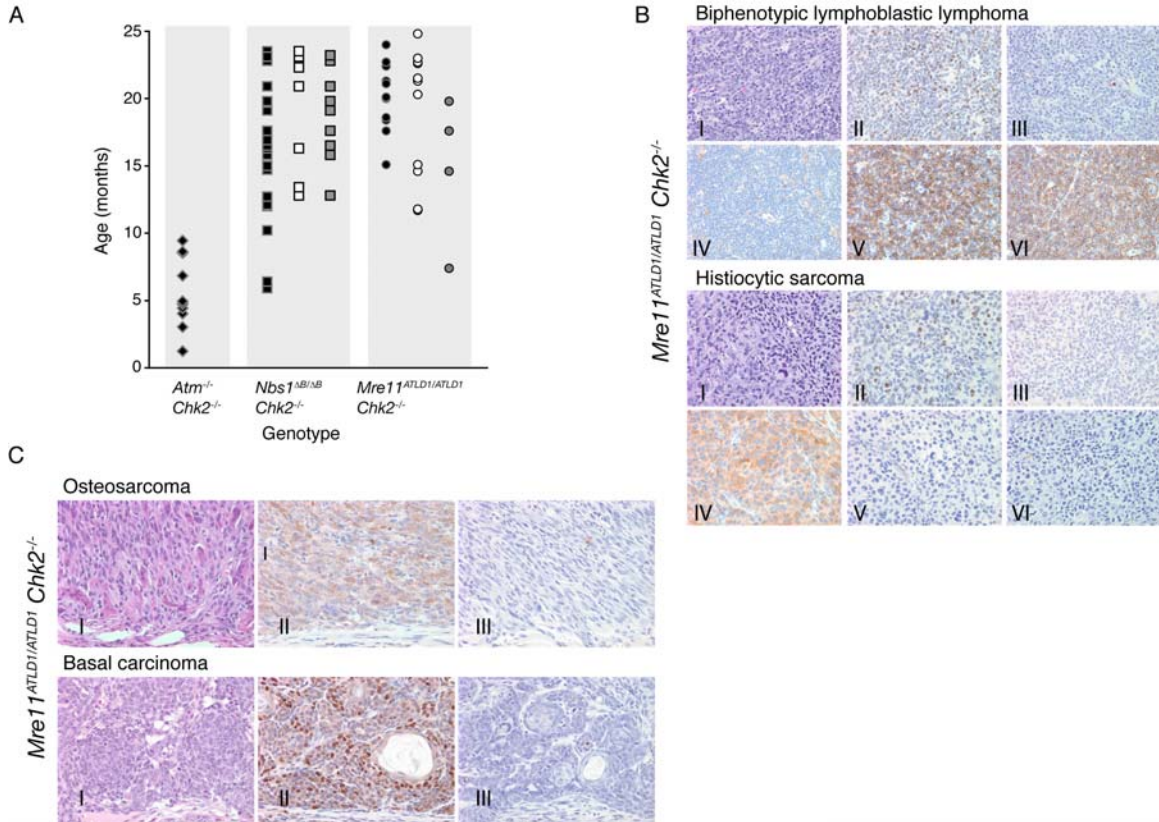

**Figure S7. Tumor onset and histology.**

(A) Graph depicting age of tumor onset in the indicated genotypes. Lymphomas are represented in black, carcinomas and sarcomas in white, and benign tumors in gray. No pattern emerged regarding tumor type and animal age.

(B) Examples of lymphoma histology stained with H&E (I), Ki67 (II), TUNEL (III), MAC2 (IV), CD3 (V), B220 (VI). A biphenotypic lymphoblastic lymphoma (top) and a histiocytic sarcoma (bottom) from *Mre11*<sup>ATLD1/ATLD1</sup> *Chk2*<sup>-/-</sup> animals are shown.

(C) Examples of tumor histology stained with H&E (I), Ki67 (II), or TUNEL (III). An osteosarcoma (top panels) and a basal carcinoma (bottom panels) from *Mre11*<sup>ATLD1/ATLD1</sup> *Chk2*<sup>-/-</sup> animals are shown. Diffuse Ki67 staining in the top panel is a result of decalcification.

**Table S4. Pathology of *Nbs1*<sup>ΔB/ΔB</sup> *Chk2*<sup>-/-</sup> and *Mre11*<sup>ATLD1/ATLD1</sup> *Chk2*<sup>-/-</sup> mice.**

The genotypes, age, sex, and pathological assessment are listed for the double mutant cohorts.

| <b>ID</b> | <b>Genotype</b>                                         | <b>Sex/age</b> | <b>Pathology</b>                                                                                                                                                                             |
|-----------|---------------------------------------------------------|----------------|----------------------------------------------------------------------------------------------------------------------------------------------------------------------------------------------|
| 44883     | <i>Nbs1</i> <sup>ΔB/ΔB</sup> <i>Chk2</i> <sup>-/-</sup> | F/5.9          | Thymic lymphoma                                                                                                                                                                              |
| 25143     | <i>Nbs1</i> <sup>ΔB/ΔB</sup> <i>Chk2</i> <sup>-/-</sup> | M/5.9          | Lymphoma involving the thymus, lymph node, kidney, spleen, and lung.                                                                                                                         |
| 23647     | <i>Nbs1</i> <sup>ΔB/ΔB</sup> <i>Chk2</i> <sup>-/-</sup> | F/6.4          | Enteric lymphosarcoma involving jejunum and pancreatic lymph node                                                                                                                            |
| 26362     | <i>Nbs1</i> <sup>ΔB/ΔB</sup> <i>Chk2</i> <sup>-/-</sup> | F/10.2         | Thymic lymphoma                                                                                                                                                                              |
| 24071     | <i>Nbs1</i> <sup>ΔB/ΔB</sup> <i>Chk2</i> <sup>-/-</sup> | F/12           | Thymic lymphoma                                                                                                                                                                              |
| 24369     | <i>Nbs1</i> <sup>ΔB/ΔB</sup> <i>Chk2</i> <sup>-/-</sup> | F/12.1         | Histiocytic sarcoma, spleen                                                                                                                                                                  |
| 26013     | <i>Nbs1</i> <sup>ΔB/ΔB</sup> <i>Chk2</i> <sup>-/-</sup> | F/12.7         | Thymic lymphoma                                                                                                                                                                              |
| 23649     | <i>Nbs1</i> <sup>ΔB/ΔB</sup> <i>Chk2</i> <sup>-/-</sup> | F/12.8         | Mammary carcinoma w/ squamous differentiation<br>Uterine hemangioma                                                                                                                          |
| 30472     | <i>Nbs1</i> <sup>ΔB/ΔB</sup> <i>Chk2</i> <sup>-/-</sup> | F/13.4         | Mammary gland adenosquamous carcinoma                                                                                                                                                        |
| 23323     | <i>Nbs1</i> <sup>ΔB/ΔB</sup> <i>Chk2</i> <sup>-/-</sup> | F/14.6         | Hepatic and splenic lymphoma                                                                                                                                                                 |
|           | <i>Nbs1</i> <sup>ΔB/ΔB</sup> <i>Chk2</i> <sup>-/-</sup> | F15            | Histiocytic sarcoma<br>Hemangiosarcoma                                                                                                                                                       |
|           | <i>Nbs1</i> <sup>ΔB/ΔB</sup> <i>Chk2</i> <sup>-/-</sup> | F/15.8         | Histiocytic sarcoma<br>Mammary gland adenocanthoma                                                                                                                                           |
| 30235     | <i>Nbs1</i> <sup>ΔB/ΔB</sup> <i>Chk2</i> <sup>-/-</sup> | M/16.3         | Hepatocellular carcinoma                                                                                                                                                                     |
| 30236     | <i>Nbs1</i> <sup>ΔB/ΔB</sup> <i>Chk2</i> <sup>-/-</sup> | M/16.3         | Lymphoma of the submandibular and mesenteric lymph nodes                                                                                                                                     |
| 30237     | <i>Nbs1</i> <sup>ΔB/ΔB</sup> <i>Chk2</i> <sup>-/-</sup> | M/16.5         | Lymphoma involving the thymus and mesenteric lymph node,<br>Pituitary gland pars intermedia adenoma with compression of overlying brain parenchyma                                           |
| 26527     | <i>Nbs1</i> <sup>ΔB/ΔB</sup> <i>Chk2</i> <sup>-/-</sup> | F/16.9         | Lymphoma involving the lung, thymus, kidney, lymph nodes, liver, spleen, pancreas and bone marrow<br>Histiocytic sarcoma of liver                                                            |
| 26137     | <i>Nbs1</i> <sup>ΔB/ΔB</sup> <i>Chk2</i> <sup>-/-</sup> | M/17.6         | Bronciolo/alveolar adenoma                                                                                                                                                                   |
| 23646     | <i>Nbs1</i> <sup>ΔB/ΔB</sup> <i>Chk2</i> <sup>-/-</sup> | F/19.1         | Lymphoma involving the liver, spleen, kidneys, lungs, lymph nodes, pancreas, adrenal gland, ovary, uterus, urinary bladder and brown adipose tissue<br>Basophil adenoma of the pars distalis |
| 24378     | <i>Nbs1</i> <sup>ΔB/ΔB</sup> <i>Chk2</i> <sup>-/-</sup> | F/19.7         | Histiocytic sarcoma                                                                                                                                                                          |
| 23321     | <i>Nbs1</i> <sup>ΔB/ΔB</sup> <i>Chk2</i> <sup>-/-</sup> | M/19.8         | Hepatoma and glycogenosis                                                                                                                                                                    |
| 24098     | <i>Nbs1</i> <sup>ΔB/ΔB</sup> <i>Chk2</i> <sup>-/-</sup> | F/20.9         | Thymic lymphoma<br>Pituitary gland pars distalis adenoma<br>Basal carcinomas w/ squamous differentiation                                                                                     |
| 25428     | <i>Nbs1</i> <sup>ΔB/ΔB</sup> <i>Chk2</i> <sup>-/-</sup> | M/22.3         | Unilateral pheochromocytoma<br>Hemangiosarcoma                                                                                                                                               |
| 21872     | <i>Nbs1</i> <sup>ΔB/ΔB</sup> <i>Chk2</i> <sup>-/-</sup> | M/22..8        | Histiocytic Sarcoma involving the lungs, kidneys, spleen, lymph nodes, pancreas and liver<br>Bronchiolo/alveolar adenoma                                                                     |
| 23828     | <i>Nbs1</i> <sup>ΔB/ΔB</sup> <i>Chk2</i> <sup>-/-</sup> | F/23.1         | Lymphoma of lymph node                                                                                                                                                                       |

|       |                                                                |        |                                                                                                                                                                                                                                                               |
|-------|----------------------------------------------------------------|--------|---------------------------------------------------------------------------------------------------------------------------------------------------------------------------------------------------------------------------------------------------------------|
|       |                                                                |        | Granulosa cell tumor<br>Endometrial carcinoma with endometrial hyperplasia                                                                                                                                                                                    |
| 23825 | <i>Nbs1</i> <sup>ΔB/ΔB</sup> <i>Chk2</i> <sup>-/-</sup>        | F/23.2 | Lymphoma involving the thymus, epicardium, lungs, liver, lymph nodes, and small intestine (Peyer's patch)<br>Bronchioloalveolar adenoma                                                                                                                       |
| 25094 | <i>Nbs1</i> <sup>ΔB/ΔB</sup> <i>Chk2</i> <sup>-/-</sup>        | M/23.5 | Uterine leiomyosarcoma with necrosis<br>Pars distalis basophilic hyperplasia                                                                                                                                                                                  |
| 25098 | <i>Nbs1</i> <sup>ΔB/ΔB</sup> <i>Chk2</i> <sup>-/-</sup>        | F/23.5 | Lymphoma, granulosa cell tumor<br>Bronchioalveolar carcinoma                                                                                                                                                                                                  |
| 23663 | <i>Mre11</i> <sup>ATLD1/ATLD1</sup> <i>Chk2</i> <sup>-/-</sup> | M/7.4  | Bronchoalveolar adenoma                                                                                                                                                                                                                                       |
| 30262 |                                                                | F/8.6  | Lymphoma of lymph node                                                                                                                                                                                                                                        |
| 21500 | <i>Mre11</i> <sup>ATLD1/ATLD1</sup> <i>Chk2</i> <sup>-/-</sup> | F/11.7 | Mammary adenocarcinoma                                                                                                                                                                                                                                        |
| 22790 | <i>Mre11</i> <sup>ATLD1/ATLD1</sup> <i>Chk2</i> <sup>-/-</sup> | F/11.8 | Basal carcinoma w/ squamous differentiation                                                                                                                                                                                                                   |
| 25135 | <i>Mre11</i> <sup>ATLD1/ATLD1</sup> <i>Chk2</i> <sup>-/-</sup> | F/14.6 | Basal cell tumor                                                                                                                                                                                                                                              |
| 25440 | <i>Mre11</i> <sup>ATLD1/ATLD1</sup> <i>Chk2</i> <sup>-/-</sup> | M/14.6 | Osteoblastic osteosarcoma<br>Prostatic intraepithelial neoplasia                                                                                                                                                                                              |
| 22024 | <i>Mre11</i> <sup>ATLD1/ATLD1</sup> <i>Chk2</i> <sup>-/-</sup> | M/15.1 | Histiocytic sarcoma<br>Hepatocellular carcinoma                                                                                                                                                                                                               |
| 22705 | <i>Mre11</i> <sup>ATLD1/ATLD1</sup> <i>Chk2</i> <sup>-/-</sup> | M/17.6 | Multicentric lymphoma                                                                                                                                                                                                                                         |
| 23180 | <i>Mre11</i> <sup>ATLD1/ATLD1</sup> <i>Chk2</i> <sup>-/-</sup> | M/17.6 | Hepatoma                                                                                                                                                                                                                                                      |
| 25129 | <i>Mre11</i> <sup>ATLD1/ATLD1</sup> <i>Chk2</i> <sup>-/-</sup> | M/17.6 | Hepatic histiocytic sarcoma                                                                                                                                                                                                                                   |
| 22185 | <i>Mre11</i> <sup>ATLD1/ATLD1</sup> <i>Chk2</i> <sup>-/-</sup> | F/18.4 | Thymic lymphoma                                                                                                                                                                                                                                               |
| 23141 | <i>Mre11</i> <sup>ATLD1/ATLD1</sup> <i>Chk2</i> <sup>-/-</sup> | F/18.6 | Lymphoma in the lungs, spleen, lymph nodes and Peyer's patch                                                                                                                                                                                                  |
| 23665 | <i>Mre11</i> <sup>ATLD1/ATLD1</sup> <i>Chk2</i> <sup>-/-</sup> | M/19.8 | Pituitary gland pars intermedia adenoma with dorsal expansion and compression of brain<br>Mesenteric lymph node lymphoma                                                                                                                                      |
| 22435 | <i>Mre11</i> <sup>ATLD1/ATLD1</sup> <i>Chk2</i> <sup>-/-</sup> | M/20   | Histiocytic sarcoma involving the lungs, lymph nodes, kidneys, spleen, liver and bone marrow                                                                                                                                                                  |
| 23896 | <i>Mre11</i> <sup>ATLD1/ATLD1</sup> <i>Chk2</i> <sup>-/-</sup> | M/20.1 | Small intestinal lymphoma with ulceration, rupture and necrosuppurative enteritis                                                                                                                                                                             |
| 23178 | <i>Mre11</i> <sup>ATLD1/ATLD1</sup> <i>Chk2</i> <sup>-/-</sup> | F/20.3 | Poorly differentiated spindle sarcoma                                                                                                                                                                                                                         |
| 24285 | <i>Mre11</i> <sup>ATLD1/ATLD1</sup> <i>Chk2</i> <sup>-/-</sup> | M/21.1 | Lymphoma of the lymph nodes and spleen                                                                                                                                                                                                                        |
| 24301 | <i>Mre11</i> <sup>ATLD1/ATLD1</sup> <i>Chk2</i> <sup>-/-</sup> | F/21.1 | Lymphoma involving the thymus, pulmonary interstitium, epicardium, kidneys, liver, spleen, lymph nodes, pancreas, ovary, oviduct and bone marrow<br>Histiocytic sarcoma involving the kidneys, liver, gastric serosa, lymph node, ovary, oviduct, bone marrow |
| 23905 | <i>Mre11</i> <sup>ATLD1/ATLD1</sup> <i>Chk2</i> <sup>-/-</sup> | M/21.3 | Adenocarcinoma of the Haderian gland, poorly differentiated, unilateral with osteolysis, extension rostrally to the nasal cavity and caudally to compress the brain and pulmonary metastasis<br>Hemangiosarcoma                                               |
| 24170 | <i>Mre11</i> <sup>ATLD1/ATLD1</sup> <i>Chk2</i> <sup>-/-</sup> | M/21.3 | Lymphoma involving the small intestinal Peyer's patch and lymph node                                                                                                                                                                                          |
| 21950 | <i>Mre11</i> <sup>ATLD1/ATLD1</sup> <i>Chk2</i> <sup>-/-</sup> | M/21.5 | Bronchiolo/alveolar carcinomas                                                                                                                                                                                                                                |
| 23903 | <i>Mre11</i> <sup>ATLD1/ATLD1</sup> <i>Chk2</i> <sup>-/-</sup> | F/22.4 | Thymic lymphoma                                                                                                                                                                                                                                               |

|       |                                                                |        |                                                                                                                                            |
|-------|----------------------------------------------------------------|--------|--------------------------------------------------------------------------------------------------------------------------------------------|
| 23182 | <i>Mre11</i> <sup>ATLD1/ATLD1</sup> <i>Chk2</i> <sup>-/-</sup> | F/22.6 | Osteosarcoma of hindlimb with liver metastasis                                                                                             |
| 23899 | <i>Mre11</i> <sup>ATLD1/ATLD1</sup> <i>Chk2</i> <sup>-/-</sup> | M/22.7 | Lymphoma involving the spleen and thymus                                                                                                   |
| 23186 | <i>Mre11</i> <sup>ATLD1/ATLD1</sup> <i>Chk2</i> <sup>-/-</sup> | F/22.7 | Adeno/squamous carcinoma                                                                                                                   |
| 23902 | <i>Mre11</i> <sup>ATLD1/ATLD1</sup> <i>Chk2</i> <sup>-/-</sup> | F/23   | Basal carcinoma with squamous differentiation<br>Stromal sarcoma of uterus                                                                 |
| 25002 | <i>Mre11</i> <sup>ATLD1/ATLD1</sup> <i>Chk2</i> <sup>-/-</sup> | M/24   | Lymphoma with evidence of leukemia involving the lungs, lymph nodes, liver, spleen, pancreas, abdominal adipose tissue and urinary bladder |
| 21473 | <i>Mre11</i> <sup>ATLD1/ATLD1</sup> <i>Chk2</i> <sup>-/-</sup> | M/24   | Dermal/subcutaneous spindle sarcoma                                                                                                        |
